# Supplementary material for: Three-Dimensional Collagen Type I Matrix Up-Regulates Nuclear Isoforms of the Microtubule Associated Protein Tau Implicated in Resistance to Paclitaxel Therapy in Ovarian Carcinoma
Source: MDPI journal article supplement (doi:10.3390/ijms16023419), 2015-02-04
Supplement: s1 [file s1]

## Supplementary Information

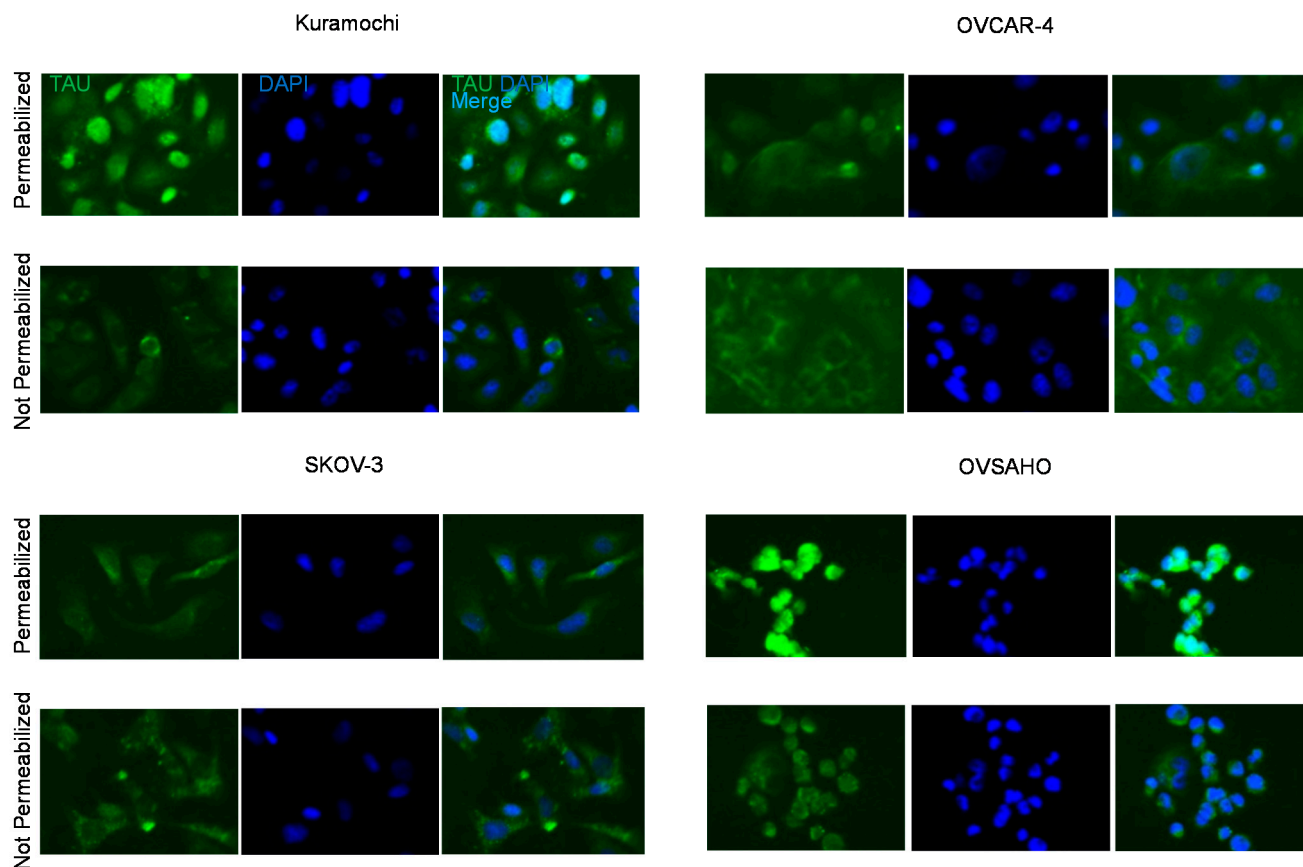

**Figure S1.** Expression of tau in permeabilized and not permeabilized ovarian carcinoma cell lines Kuramochi, OVCAR-4, SKOV-3, and OVSAHO was visualized using immunofluorescence staining with anti-tau antibodies. Images were generated using a Zeiss fluorescence microscope and 20× objective lens. The fluorescence signal from tau staining (green) was overlaid with DAPI staining (blue) to generate a merged image (light blue).
